# Supplementary material for: Membrane and Cytoplasmic Proteins of Mycobacterium avium subspecies paratuberculosis that Bind to Novel Monoclonal Antibodies
Source: Microorganisms. 2018 Dec 11;6(4):127. doi: 10.3390/microorganisms6040127 (PMC6313528; doi:10.3390/microorganisms6040127)
Supplement: Supplementary file 1 [file microorganisms-06-00127-s001.zip]

Archive with 4 entries (4 files):
- Supplemental figures.pdf
- Table S1-dot blot array assignments.xlsx
- Table S2-Peptide libraries.xlsx
- Table S3-mAb reactivity with mycobacteria.xlsx
