# Supplementary material for: Membrane and Cytoplasmic Proteins of Mycobacterium avium subspecies paratuberculosis that Bind to Novel Monoclonal Antibodies
Source: Microorganisms. 2018 Dec 11;6(4):127. doi: 10.3390/microorganisms6040127 (PMC6313528; doi:10.3390/microorganisms6040127)
Supplement: Supplementary file 1 [file microorganisms-06-00127-s001.zip › Table S1-dot blot array assignments.xlsx]

## Sheet: Assignments
Table S1. Recombinant protein assignments on the dot blot array shown in Figure 2B
Spot	Protein #1	Protein #2	Protein #3	Protein #4
A1	MAP_2153	MAP_1231	MAP_0866	MAP_0853
A2	MAP_1682c	MAP_3868	MAP_1301	MAP_1346c
A3	MAP_0975c	MAP_1933	MAP_1418c	MAP_1238c	*Note: the positive well is highlighted below
A4	MAP_3866c	MAP_1567	MAP_1356c	MAP_1184c	*Note: the two control wells are shown in red
A5	MAP_4082	MAP_1808c	MAP_1410	MAP_1025	*Note: each protein was spotted at 0.5-1.0 ug/ml concentration
A6	MAP_2743c	MAP_2210c	MAP_1546c	MAP_2299c	*Note: spotting volumes were identical, brought up to 400 ul with PBS
A7	MAP_3531c	MAP_0875c	MAP_3610	MAP_1823c
A8	MAP_1931c	MAP_2148	MAP_1742c	MAP_0389
A9	MAP_1730c	MAP_0334	MAP_2412c	MAP_3205
A10	MAP_3121	MAP_3743	MAP_0434	MAP_2878c
A11	MAP_1233	MAP_2191	MAP_1365	MAP_1297
A12	MAP_1315c	MAP_4014	MAP_2949c	MAP_0139c
B1	MAP_2211c	MAP_1175c	MAP_2187c	MAP_2685
B2	MAP_0998c	MAP_3567	MAP_2830c	MAP_2190
B3	MAP_4025	MAP_1937c	MAP_3071	MAP_1017c
B4	MAP_2740	MAP_2154c	MAP_2505	MAP_3627
B5	MAP_2381	MAP_2843c	MAP_4339	MAP_2184c
B6	MAP_3807	MAP_0214	MAP_3775c	MAP_3776c
B7	MAP_3774c	MAP_1724c	MAP_3883c	MAP_3269
B8	MAP_1182c	MAP_1392c	MAP_0241c	MAP_2181c
B9	MAP_1550c	MAP_1109	MAP_0670	MAP_3271c
B10	MAP_1572c	MAP_0239c	MAP_3699c	MAP_3290c
B11	MAP_1829c	MAP_1224c	MAP_0824	MAP_0240c
B12	MAP_1012c	MAP_1680c	MAP_0989	MAP_0072c
C1	MAP_1160c	MAP_0268c	MAP_1723	MAP_0648c
C2	MAP_3491	MAP_1476c	MAP_0887c	MAP_3939c
C3	MAP_3841	MAP_1278c	MAP_0337	MAP_2823
C4	MAP_0981c	MAP_1265	MAP_1183c	MAP_0234c
C5	MAP_1207	MAP_1807c	MAP_2872c	MAP_4232
C6	MAP_1826c	MAP_3307c	MAP_1129	MAP_2737
C7	MAP_1019	MAP_1317c	MAP_4233	MAP_3540c
C8	MAP_3732c	MAP_1840	MAP_1765c	MAP_3697c
C9	MAP_2539c	MAP_2083c	MAP_3968	MAP_0440c
C10	MAP_2020	MAP_3532c	MAP_3395	MAP_0936
C11	MAP_2304	MAP_1918c	MAP_2497c	MAP_1589c
C12	MAP_2316	MAP_2226c	MAP_2522	MAP_1138c
D1	PBS	MAP sonicate
D2	MAP_2761	MAP_3266c	MAP_0417	MAP_1393c
D3	MAP_2751	MAP_4006	MAP_2128c	MAP_0900
D4	MAP_3292c	MAP_1986	MAP_2535	MAP_1194c
D5	MAP_3452c	MAP_1506	MAP_2248c	MAP_1095c
D6	MAP_3863c	MAP_1938c	MAP_2216c	MAP_1781
D7	MAP_3615c	MAP_4308c	MAP_2684c	MAP_2541c
D8	MAP_3833c	MAP_0054c	MAP_1152	MAP_1825
D9	MAP_2156	MAP_1881	MAP_2979	MAP_3385
D10	MAP_0859c	MAP_0086	MAP_3005c	MAP_0455
D11	MAP_0487c	MAP_0324	MAP_3004c	MAP_1754c
D12	MAP_0562	MAP_3530	MAP_3056	MAP_1663
E1	MAP_0608c	MAP_0146	MAP_3217c	MAP_0189
E2	MAP_1387c	MAP_0369	MAP_2739	MAP_1889c
E3	MAP_1679c	MAP_0123	MAP_2560	MAP_1638c
E4	MAP_1755c	MAP_0144	MAP_3495c	MAP_2009
E5	MAP_1789	MAP_0275	MAP_3688	MAP_1654c
E6	MAP_2640c	MAP_0087-his	MAP_3727	MAP_1909
E7	MAP_2228	MAP_3084c-his	MAP_3788	MAP_3815
E8	MAP_3171c	MAP_0566	MAP_3806	MAP_3812c
E9	MAP_3172c	MAP_0092	MAP_3837c	MAP_2781
E10	MAP_2511	MAP_1005	MAP_3955	MAP_4075c
E11	MAP_1609c	MAP_0771	MAP_3975	MAP_2973
E12	MAP_3532c	MAP_0051c	MAP_3481	MAP_4288
F1	MAP_4175	MAP_0410	MAP_1521	MAP_4259
F2	MAP_3753	MAP_0091c	MAP_3417c	MAP_1204
F3	MAP_1104c	MAP_2646c	MAP_3898	MAP_2073c
F4	MAP_3437c	MAP_1651c	MAP_0357	MAP_2225c
F5	MAP_0904	MAP_1337c	MAP_0563	MAP_3862c
F6	MAP_2657	MAP_0411	MAP_0080c	MAP_4074
F7	MAP_2767c	MAP_3288	MAP_0772	MAP_3195
F8	MAP_1563c	MAP_4236c	MAP_0974	MAP_0216
F9	MAP_0862	MAP_2971c	MAP_1272c	MAP_0736
F10	MAP_4129	MAP_0575	MAP_1054	MAP_1174c
F11	MAP_0855	MAP_0834c	MAP_1170	MAP_4207c
F12	MAP_3761c	MAP_4263	MAP_1802c	MAP_2158
G1	MAP_0863	MAP_2121c	MAP_3679	MAP_1232
G2	MAP_0007	MAP_0187c	MAP_3220c	MAP_3444
G3	MAP_0124	MAP_2058c	MAP_3614	MAP_1089
G4	MAP_1932	MAP_4125	MAP_4224c	MAP_3024c
G5	MAP_0894c	MAP_0516c	MAP_3270	MAP_4225c
G6	PBS	MAP_0564	MAP_4254	MAP_0585
G7	PBS	MAP_2855c	MAP_4255	MAP_4272c
G8	PBS	MAP_1525	MAP_2753	MAP_0184c
G9	PBS	MAP_0961c	MAP_1345	MAP_3817c
G10	PBS	MAP_1234	MAP_0036	MAP_3434
G11	PBS	MAP_1210	MAP_0578	MAP_0860c
G12	PBS	MAP_1236c	MAP_3184	MAP_1662c
H1	PBS	MAP_1535	MAP_0518	MAP_0398c
H2	PBS	MAP_3943	MAP_0966c	MAP_2698c
H3	PBS	MAP_3316	MAP_0508	MAP_3061c
H4	PBS	MAP_2720c	MAP_2281c	MAP_3190
H5	PBS	MAP_1298	MAP_3324c	MAP_1846c
H6	PBS	MAP_0687	MAP_3577	MAP_1834c
H7	PBS	MAP_0997c	MAP_3420c	MAP_2280c
H8	PBS	MAP_1110	MAP_3007	MAP_1564c
H9	PBS	MAP_0613c	MAP_0245c
H10	PBS	MAP_2864c	MAP_0170
H11	MAP_0773	MAP_4088	MAP_0574	MAP_0654
H12	PBS	MAP sonicate
