# Supplementary material for: Membrane and Cytoplasmic Proteins of Mycobacterium avium subspecies paratuberculosis that Bind to Novel Monoclonal Antibodies
Source: Microorganisms. 2018 Dec 11;6(4):127. doi: 10.3390/microorganisms6040127 (PMC6313528; doi:10.3390/microorganisms6040127)
Supplement: Supplementary file 1 [file microorganisms-06-00127-s001.zip › Table S2-Peptide libraries.xlsx]

## Sheet: Sheet1
Table S2. Peptide library sequences and spot/well locations for MAP_2698c and MAP_3404
MAP_2698c peptide library				MAP_3404 peptide library
Spot/well	Peptide sequence			Spot/well	Peptide sequence
A1	MAERPVANALTLELEPVVEA	20-mer		A1	LPICQTGGAVASHAS	15-mer
A2	VANALTLELEPVVEANMDRH	peptides		A2	GAVASHASSRISKVL	peptides
A3	TLELEPVVEANMDRHLSTEE	with 15 aa		A3	SSRISKVLVANRGEI	with 8 aa
A4	PVVEANMDRHLSTEELWFAH	overlap		A4	LVANRGEIAVRVIRA	overlap
A5	NMDRHLSTEELWFAHDYVPY			A5	IAVRVIRAARDAGLS
A6	LSTEELWFAHDYVPYDRGEN			A6	AARDAGLSSVAVYAE
A7	LWFAHDYVPYDRGENFAFLG			A7	SSVAVYAEPDADAPH
A8	DYVPYDRGENFAFLGGRDWD			A8	EPDADAPHVRLADEA
A9	DRGENFAFLGGRDWDPSSAT			A9	HVRLADEAFALGGQT
A10	FAFLGGRDWDPSSATLPRPL			A10	AFALGGQTSAESYLD
A11	GRDWDPSSATLPRPLTDACE			A11	TSAESYLDFGKLLDA
A12	PSSATLPRPLTDACEIMLLL			A12	DFGKLLDAAAKSGAN
B1	LPRPLTDACEIMLLLKDNLA			B1	AAAKSGANAIHPGYG
B2	TDACEIMLLLKDNLAAHHRE			B2	NAIHPGYGFLSENAD
B3	IMLLLKDNLAAHHRELVEHF			B3	GFLSENADFAQAVID
B4	KDNLAAHHRELVEHFILEDY			B4	DFAQAVIDAGLIWIG
B5	AHHRELVEHFILEDYWGRWL			B5	DAGLIWIGPSPQSIR
B6	LVEHFILEDYWGRWLGRWTA			B6	GPSPQSIRDLGDKVT
B7	ILEDYWGRWLGRWTAEEHLH			B7	RDLGDKVTARHIAAR
B8	WGRWLGRWTAEEHLHAIALR			B8	TARHIAARAQAPLVP
B9	GRWTAEEHLHAIALRNYLVV			B9	RAQAPLVPGTPDPVK
B10	EEHLHAIALRNYLVVTREVD			B10	PGTPDPVKDADEVVA
B11	AIALRNYLVVTREVDPTANE			B11	KDADEVVAFAKEYGV
B12	NYLVVTREVDPTANEEARVQ			B12	AFAKEYGVPIAIKAA
C1	TREVDPTANEEARVQYVMKG			C1	VPIAIKAAFGGGGKG
C2	PTANEEARVQYVMKGYRADT			C2	AFGGGGKGMKVARTI
C3	EARVQYVMKGYRADTYSQVE			C3	GMKVARTIEEIPELY
C4	YVMKGYRADTYSQVETLVYM			C4	IEEIPELYESAVREA
C5	YRADTYSQVETLVYMAFTER			C5	YESAVREAVAAFGRG
C6	YSQVETLVYMAFTERSHAVF			C6	AVAAFGRGECFVERY
C7	TLVYMAFTERSHAVFCENLS			C7	GECFVERYLDKPRHV
C8	AFTERSHAVFCENLSAKLEE			C8	YLDKPRHVEAQVIAD
C9	SHAVFCENLSAKLEEPILSG			C9	VEAQVIADQHGNVVV
C10	CENLSAKLEEPILSGLVDRI			C10	DQHGNVVVAGTRDCS
C11	AKLEEPILSGLVDRISRDER			C11	VAGTRDCSLQRRFQK
C12	PILSGLVDRISRDERRHELF			C12	SLQRRFQKLVEEAPA
D1	LVDRISRDERRHELFFSNLV			D1	KLVEEAPAPFLSDAQ
D2	SRDERRHELFFSNLVAHCLE			D2	APFLSDAQRKEIHES
D3	RHELFFSNLVAHCLEYTRDE			D3	QRKEIHESAKRICKE
D4	FSNLVAHCLEYTRDETIAAI			D4	SAKRICKEAHYYGAG
D5	AHCLEYTRDETIAAIAARAA			D5	EAHYYGAGTVEYLVG
D6	YTRDETIAAIAARAAELQVP			D6	GTVEYLVGQDGLISF
D7	TIAAIAARAAELQVPGADID			D7	GQDGLISFLEVNTRL
D8	AARAAELQVPGADIDAYQDK			D8	FLEVNTRLQVEHPVT
D9	ELQVPGADIDAYQDKLRNVA			D9	LQVEHPVTEETAGID
D10	GADIDAYQDKLRNVAEAGVF			D10	TEETAGIDLVLQQFK
D11	AYQDKLRNVAEAGVFTENDL			D11	DLVLQQFKIANGDKL
D12	LRNVAEAGVFTENDLRQVIS			D12	KIANGDKLDITEDPE
E1	EAGVFTENDLRQVISDRIRA			E1	LDITEDPEPRGHAIE
E2	TENDLRQVISDRIRAWGVAD			E2	EPRGHAIEFRINGED
E3	RQVISDRIRAWGVADEPALK			E3	EFRINGEDAGRNFLP
E4	DRIRAWGVADEPALKPFVIG			E4	DAGRNFLPAPGPVTR
E6	MBP/MAP_2698c			E5	PAPGPVTRYDIPTGP
E8	MBP/MAP_2698c			E6	RYDIPTGPGVRLDSG
				E7	PGVRLDSGVEAGSVI
				E8	GVEAGSVIGGQFDSM
				E9	IGGQFDSMLSKLIVY
				E10	MLSKLIVYGADRQQA
				E11	YGADRQQALARARRA
				E12	ALARARRALDEFHVE
				F1	ALDEFHVEGLATVIP
				F2	EGLATVIPFHRAVVR
				F3	PFHRAVVRDPAFIGD
				F4	RDPAFIGDDNGFAVH
				F5	DDNGFAVHTRWIETE
				F6	HTRWIETEWNNTVEP
				F7	EWNNTVEPFTGGEPL
				F8	PFTGGEPLDDEDARP
				F9	LDDEDARPRQKAVVE
				F10	PRQKAVVEVGGRRLE
				F11	EVGGRRLEVSLPGDL
				F12	EVSLPGDLALSNGGS
				G1	LALSNGGSADPAGVI
				G2	SADPAGVIRKKPKPR
				G3	IRKKPKPRKRGGHGG
				G4	RKRGGHGGATASGDA
				G5	GATASGDAVTAPMQG
				G6	AVTAPMQGTVVKVAV
				G7	GTVVKVAVEEGQEVS
				G8	VEEGQEVSAGDLVVV
				G9	SAGDLVVVLEAMKME
				G10	VLEAMKMENPVTAHK
				G11	ENPVTAHKDGVITGL
				G12	KDGVITGLAVEAGAA
				H1	LAVEAGAAITQGTVL
				H2	AGAAITQGTVLAEIK
				H5	MBP/MAP_3404
				H7	MBP/MAP_3404
