# Supplementary material for: Membrane and Cytoplasmic Proteins of Mycobacterium avium subspecies paratuberculosis that Bind to Novel Monoclonal Antibodies
Source: Microorganisms. 2018 Dec 11;6(4):127. doi: 10.3390/microorganisms6040127 (PMC6313528; doi:10.3390/microorganisms6040127)
Supplement: Supplementary file 1 [file microorganisms-06-00127-s001.zip › Table S3-mAb reactivity with mycobacteria.xlsx]

## Sheet: Sheet1
Table S3. Monoclonal antibody reactivity to mycobacterial species
Mycobacteria	13G7	7E8	12F9	11B8	3G5	9H3	6C9	7A6	11F8	10C12	7C8	2D12	8C6	10D2	1C8	14G11	14G3	17A12	4G1	9G10	11F6	14C5	8G6	13E1	8G2	14D4	12E4	11G4	13A4	12C9	4B6	5E6	10D4	11F9	1F2	4A9	Num. Pos.	% Pos
M. avium subsp. silvaticum	+	+	-	+	+	+	+	-	-	-	+	-	+	+	+	+	+	-	+	+	+	+	+	+	+	+	+	+	+	+	+	+	+	-	-	+	29	80
M. scrofulaceum	-	-	+	-	+	+	+	+	+	-	-	-	-	-	-	-	-	-	+	-	-	-	+	-	-	+	+	+	+	-	+	+	-	-	+	-	15	42
M. abscessus ATCC19977	-	-	-	-	-	-	-	-	-	-	+	-	-	-	-	-	-	-	-	-	+	-	-	-	+	-	-	+	+	-	+	-	-	+	-	+	8	22
M. avium subsp. paratuberculosis K-10	+	+	+	+	+	+	+	+	+	+	+	+	+	+	+	+	+	+	+	+	+	+	+	+	+	+	+	+	+	+	+	+	+	+	+	+	36	100
M. avium subsp. avium - chicken isolate	+	+	+	+	-	+	-	+	+	+	-	+	+	+	+	+	+	-	-	+	+	+	+	+	+	-	+	+	+	+	+	+	+	+	+	+	30	83
M. bovis 95-1315	+	+	-	-	-	-	-	+	+	+	-	-	-	-	-	-	-	-	-	-	+	-	-	-	-	+	-	-	-	-	+	+	-	-	-	-	9	25
M. phlei	+	+	-	-	-	-	-	+	+	+	+	-	-	-	-	-	-	-	+	-	+	-	-	-	-	+	-	-	+	-	+	-	-	-	-	-	11	30
M. avium hominissuis (MAC104)	-	-	+	+	-	+	-	+	+	+	+	-	-	-	-	+	+	-	-	+	+	+	+	+	+	+	-	+	+	+	+	+	+	-	-	-	22	61
M. avium subsp. paratuberculosis ATCC 19698	-	-	+	+	+	+	+	+	+	+	+	+	+	+	+	+	+	+	+	+	+	+	+	+	+	-	+	+	+	+	+	+	+	+	+	+	32	89
M. intracellulare	+	+	+	+	+	+	+	+	-	+	+	+	+	+	+	+	+	-	+	+	+	+	+	+	+	-	-	+	+	+	+	+	+	-	+	-	29	80
M. avium subsp. paratuberculosis Linda	+	+	+	+	+	+	+	+	+	+	+	+	+	+	+	+	+	+	+	+	+	+	+	+	+	+	+	+	+	+	+	+	+	-	-	+	33	92
M. avium subsp. avium - pygmy rabbit isolate	+	+	+	-	-	+	-	+	-	+	+	+	+	+	+	+	+	-	-	+	+	+	+	+	+	+	-	+	+	+	+	+	+	+	+	+	29	80
M. kansasii	-	-	-	-	-	-	-	+	-	-	-	-	-	-	-	-	-	-	-	-	-	-	+	-	+	+	-	-	+	-	+	-	-	-	-	-	6	17
M. avium subsp. paratuberculosis S397	+	+	+	+	+	+	+	+	+	+	+	+	+	+	+	+	+	-	+	+	+	+	+	+	+	+	+	+	+	+	+	+	+	+	+	+	35	97
M. smegmatis	-	-	-	-	-	-	-	-	-	-	-	-	-	-	-	-	-	-	-	-	-	-	-	-	-	-	-	-	-	-	+	+	-	-	-	-	2	6
aReactivity was measured by Western blot and ELISA for each datapoint
